# Supplementary material
Source: PubMed Central journal article supplement (PMC3241813)
Supplement: 1110748108_pnas.201110748SI.pdf [file 1110748108_pnas.201110748SI.pdf]

# Supporting Information

Poelman et al. 10.1073/pnas.1110748108

## SI Text

**Cloning of Transcription Factor *BoMYC* as an Example in the Study.** A partial sequence (575 bp) of the cabbage transcription factor (*MYC*) was constructed after sequencing fragments were obtained by RT-PCR. In the RT-PCR we used degenerate oligonucleotide primers that were derived from *MYC* sequences of other plant species (Tables S6 and S7). A full-length cDNA of 2,071-bp nucleotides was isolated using rapid amplification of cDNA ends (5'-RACE and 3'-RACE). This cDNA clone contained an ORF starting with an ATG codon preceded by an in-frame stop codon, indicating that it contains the complete coding region. The ORF of 1,833 nucleotides (from 61 to 1893) encoded a predicted protein of 610 amino acids. This cDNA clone was designated as the

*Brassica oleracea MYC* gene, and we use *BoMYC* as the abbreviated term referring to this gene.

*BoMYC* contains a helix-loop-helix domain found in specific DNA-binding proteins that act as transcription factors. In the GenBank database, the deduced protein matches well with other bHLH-like proteins. The full-length cDNA sequence of *BoMYC* has been deposited to the GenBank database under accession no. EF423803. The deduced protein sequence of *BoMYC* contains a bHLH-type DNA-binding/dimerization domain in the C-terminal region. Sequence alignment and phylogenetic tree analysis showed that *BoMYC* shared an overall identity of 87% at the amino acid level with the *Arabidopsis AtMYC2* protein (Figs. S1 and S2). We used the same method to clone the other genes used in this study (for accession numbers see Table S6).

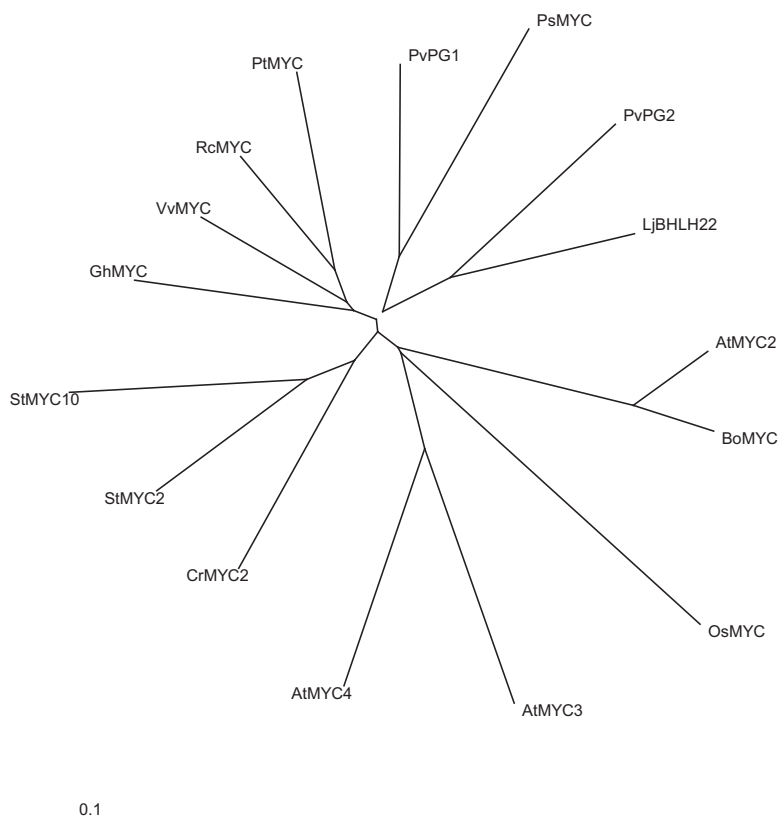

**Fig. S1.** Phylogenetic tree of *MYC* genes from different plant species. Accessions for *MYC* amino sequences represented in this tree are *Arabidopsis thaliana AtMYC2* (At1g32640); *A. thaliana AtMYC3* (At5g46760); *A. thaliana AtMYC4* (At4g17880); *B. oleracea BoMYC* (EF423803); *Oryza sativa OsMYC* (AY536428); *Catharanthus roseus CrMYC2* (AF283507); *Solanum tuberosum StMYC2* (AJ630505); *S. tuberosum StMYC10* (AJ630506); *Gossypium hirsutum GhMYC* (FJ358540); *Vitis vinifera MYC* (XM\_002280217); *Ricinus communis RcMYC* (XM\_002519768); *Populus trichocarpa PtMYC* (XM\_002326688); *Phaseolus vulgaris PvMYC* (U18348); *P. vulgaris PvMYC* (U18349); *Pisum sativum PsMYC* (DQ399528); and *Lotus japonicus LjBHLH22* (FJ379754).



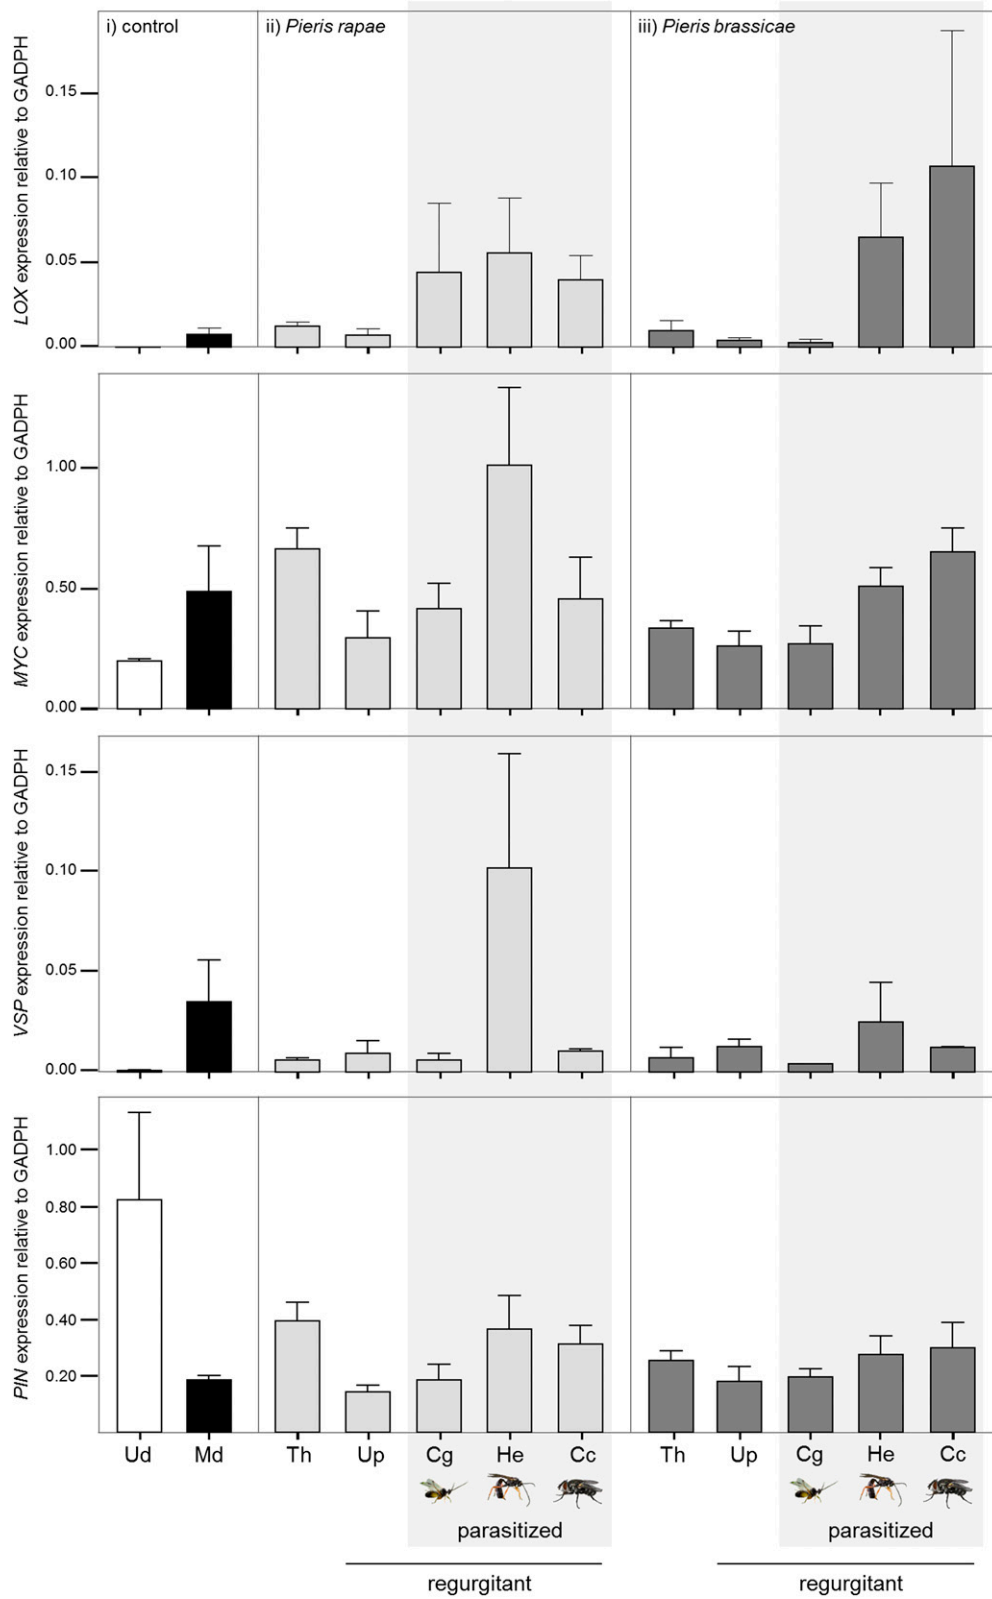

**Fig. S3.** Expression levels of *BoLOX*, *BoMYC*, *BoVSP*, and *BoPIN* 6 h after treatments were applied to *B. oleracea* plants. Treatments: undamaged plants (Ud, white bars); mechanical damage consisting of three needle punctures (Md, black bars); herbivore treatments with *Pieris rapae* (light gray) or *Pieris brassicae* (dark gray): true herbivory (Th), mechanical damage plus regurgitant from unparasitized caterpillars (Up) or caterpillars parasitized by *Cotesia glomerata* (Cg), *Hyposoter ebeninus* (He), or *Compsilura concinnata* (Cc).



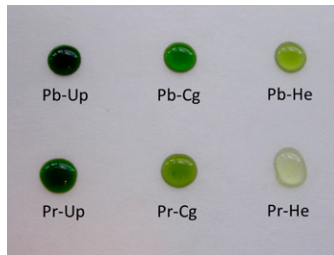

**Fig. S5.** Regurgitant of *Pieris brassicae* (Pb) and *Pieris rapae* (Pr) collected from unparasitized (Up), *Cotesia glomerata*-parasitized (Cg), and *Hyposoter ebeninus*-parasitized (He) caterpillars.

**Table S1.** Lists of different treatments in plant leaves for gene expression studies

| Parameter      | Treatment |                                      |   |                                          |   |                                                    |    |                                                                      |   |                                                                     |   |                                                                       |    |                                      |   |                                                |   |                                                                  |    |                                                                 |   |                                                                   |   |   |    |
|----------------|-----------|--------------------------------------|---|------------------------------------------|---|----------------------------------------------------|----|----------------------------------------------------------------------|---|---------------------------------------------------------------------|---|-----------------------------------------------------------------------|----|--------------------------------------|---|------------------------------------------------|---|------------------------------------------------------------------|----|-----------------------------------------------------------------|---|-------------------------------------------------------------------|---|---|----|
|                | WT        | MD                                   |   | Pb                                       |   | U-Pb                                               |    | Cg-Pb                                                                |   | He-Pb                                                               |   | Cc-Pb                                                                 |    | Pr                                   |   | U-Pr                                           |   | Cg-Pr                                                            |    | He-Pr                                                           |   | Cc-Pr                                                             |   |   |    |
| Description    | Undamaged | Mechanical damage by needle punching |   | First-instar <i>P. brassicae</i> feeding |   | Regurgitant from unparasitized <i>P. brassicae</i> |    | Regurgitant from <i>C. glomerata</i> parasitized <i>P. brassicae</i> |   | Regurgitant from <i>H. ebeninus</i> parasitized <i>P. brassicae</i> |   | Regurgitant from <i>C. concinnata</i> parasitized <i>P. brassicae</i> |    | First-instar <i>P. rapae</i> feeding |   | Regurgitant from unparasitized <i>P. rapae</i> |   | Regurgitant from <i>C. glomerata</i> parasitized <i>P. rapae</i> |    | Regurgitant from <i>H. ebeninus</i> parasitized <i>P. rapae</i> |   | Regurgitant from <i>C. concinnata</i> parasitized <i>P. rapae</i> |   |   |    |
| Time point (h) |           | 2                                    | 6 | 24                                       | 2 | 6                                                  | 24 | 2                                                                    | 6 | 24                                                                  | 2 | 6                                                                     | 24 | 2                                    | 6 | 24                                             | 2 | 6                                                                | 24 | 2                                                               | 6 | 24                                                                | 2 | 6 | 24 |
| Symbol         |           |                                      |   |                                          |   |                                                    |    |                                                                      |   |                                                                     |   |                                                                       |    |                                      |   |                                                |   |                                                                  |    |                                                                 |   |                                                                   |   |   |    |

**Table S2.** Multiple ANOVA analyses of gene expression over time (2, 6, 24 h) after plants were induced with different types of damage (undamaged, mechanical damage, mechanical damage plus regurgitant, true herbivory)

| Variable          | Time (df = 2) |        | Treatment (df = 3) |        | Time × Treatment (df = 6) |        | Post hoc treatment*         |
|-------------------|---------------|--------|--------------------|--------|---------------------------|--------|-----------------------------|
|                   | F             | P      | F                  | P      | F                         | P      |                             |
| Pillai's trace    | 3.285         | <0.001 | 6.202              | <0.001 | 2.546                     | <0.001 |                             |
| Gene              |               |        |                    |        |                           |        |                             |
| <i>BoLOX</i> (JA) | 16.859        | <0.001 | 15.553             | <0.001 | 15.439                    | <0.001 | (a = 1, 2, 3) (b = 4)       |
| <i>BoMYC</i> (JA) | 0.091         | 0.913  | 5.466              | 0.002  | 7.481                     | <0.001 | (a = 1, 2) (ab = 3) (b = 4) |
| <i>BoVSP</i> (JA) | 15.057        | <0.001 | 16.005             | <0.001 | 16.599                    | <0.001 | (a = 1, 2, 3) (b = 4)       |
| <i>BoDEF</i> (JA) | 0.900         | 0.412  | 14.023             | <0.001 | 1.297                     | 0.273  | (a = 2, 3, 4) (b = 1)       |
| <i>BoPAL</i> (SA) | 4.277         | 0.018  | 3.624              | 0.018  | 7.425                     | <0.001 | (a = 1) (ab = 2, 4) (b = 3) |
| <i>BoPR1</i> (SA) | 2.127         | 0.128  | 4.793              | 0.005  | 4.341                     | 0.001  | (a = 1, 2) (ab = 4) (b = 3) |
| <i>BoACS</i> (ET) | 1.327         | 0.273  | 2.216              | 0.096  | 3.425                     | 0.006  | —                           |
| <i>BoMYR</i>      | 0.047         | 0.954  | 0.694              | 0.559  | 3.160                     | 0.009  | —                           |
| <i>BoPIN</i>      | 3.366         | 0.041  | 22.202             | <0.001 | 1.838                     | 0.107  | (a = 2, 3) (b = 4) (c = 1)  |

Values in bold indicate significant effects at  $P < 0.05$ .

\*Post hoc classes for the factor Treatment based on Tukey: (1) undamaged plants, (2) mechanical damage, (3) mechanical damage plus regurgitant, (4) true herbivory. Classes are indicated with a, b, and c.

**Table S3. MANOVA analysis of gene expression over time (2, 6, 24 h) after plants were manually damaged and regurgitant of either *Pieris rapae* or *Pieris brassicae* caterpillars was applied, which originated from unparasitized caterpillars or caterpillars parasitized by different parasitoids (*Cotesia glomerata*, *Hyposoter ebeninus*, *Compsilura concinnata*)**

| Variable          | Time (df = 2) |        | Herbivore (df = 1) |       | Parasitoid (df = 3) |                     | Time × herbivore (df = 2) |       | Time × parasitoid (df = 6) |        | Herbivore × parasitoid (df = 3) |       | Time × herbivore × parasitoid (df = 6) |       |
|-------------------|---------------|--------|--------------------|-------|---------------------|---------------------|---------------------------|-------|----------------------------|--------|---------------------------------|-------|----------------------------------------|-------|
|                   | F             | P      | F                  | P     | F                   | P                   | F                         | P     | F                          | P      | F                               | P     | F                                      | P     |
| Pillai's trace    | 11.907        | <0.001 | 1.686              | 0.125 | 2.764               | <0.001              | 1.759                     | 0.045 | 1.935                      | <0.001 | 1.482                           | 0.077 | 1.077                                  | 0.344 |
| Gene              |               |        |                    |       |                     |                     |                           |       |                            |        |                                 |       |                                        |       |
| <i>BoLOX</i> (JA) | 9.279         | <0.001 | 0.004              | 0.947 | 4.318               | 0.009*              | 0.135                     | 0.874 | 0.354                      | 0.904  | 2.211                           | 0.099 | 1.205                                  | 0.320 |
| <i>BoMYC</i> (JA) | 40.231        | <0.001 | 1.523              | 0.223 | 11.604              | <0.001 <sup>†</sup> | 0.321                     | 0.727 | 2.389                      | 0.042  | 1.752                           | 0.169 | 0.849                                  | 0.539 |
| <i>BoVSP</i> (JA) | 3.354         | 0.043  | 0.785              | 0.380 | 3.868               | 0.015 <sup>‡</sup>  | 1.923                     | 0.157 | 2.672                      | 0.026  | 2.055                           | 0.119 | 1.336                                  | 0.260 |
| <i>BoDEF</i> (JA) | 23.552        | <0.001 | 1.726              | 0.195 | 1.920               | 0.139               | 0.026                     | 0.975 | 5.501                      | <0.001 | 5.771                           | 0.002 | 0.816                                  | 0.563 |
| <i>BoPAL</i> (SA) | 12.936        | <0.001 | 0.050              | 0.825 | 1.446               | 0.241               | 0.938                     | 0.398 | 0.989                      | 0.443  | 0.821                           | 0.489 | 0.521                                  | 0.789 |
| <i>BoPRT</i> (SA) | 0.412         | 0.665  | 0.805              | 0.374 | 0.296               | 0.828               | 0.900                     | 0.413 | 0.528                      | 0.784  | 0.479                           | 0.698 | 0.539                                  | 0.776 |
| <i>BoACS</i> (ET) | 5.490         | 0.007  | 1.735              | 0.194 | 0.491               | 0.690               | 2.142                     | 0.129 | 0.225                      | 0.967  | 0.914                           | 0.441 | 0.629                                  | 0.706 |
| <i>BoMYR</i>      | 0.907         | 0.411  | 0.894              | 0.349 | 2.648               | 0.059               | 2.546                     | 0.089 | 0.713                      | 0.641  | 1.534                           | 0.218 | 0.469                                  | 0.828 |
| <i>BoPIN</i>      | 26.174        | <0.001 | 1.591              | 0.213 | 27.871              | <0.001 <sup>§</sup> | 3.521                     | 0.037 | 3.509                      | 0.006  | 0.965                           | 0.417 | 1.372                                  | 0.345 |

Values in bold indicate significant effects at  $P < 0.05$ .

\*Post hoc classes based on Tukey (a = unparasitized) (ab = *C. glomerata*, *C. concinnata*) (b = *H. ebeninus*).

<sup>†</sup>Post hoc classes based on Tukey (a = unparasitized) (ab = *C. glomerata*) (b = *C. concinnata*) (c = *H. ebeninus*).

<sup>‡</sup>Post hoc classes based on Tukey (a = unparasitized, *C. glomerata*) (ab = *C. concinnata*) (b = *H. ebeninus*).

<sup>§</sup>Post hoc classes based on Tukey (a = unparasitized, *C. glomerata*) (b = *C. concinnata*, *H. ebeninus*).

**Table S4. Amount of feeding damage on leaves of the different induction treatments that entered the oviposition experiments**

| Herbivore*                   | Parasitism <sup>†</sup>        | No. of leaves | Mean damage (mm <sup>2</sup> ) | SD    |
|------------------------------|--------------------------------|---------------|--------------------------------|-------|
| <i>Pieris rapae</i> (Pr)     | Unparasitized (Up)             | 135           | 64.96                          | 28.02 |
| <i>Pieris rapae</i> (Pr)     | <i>Cotesia glomerata</i> (Cg)  | 145           | 40.15                          | 19.90 |
| <i>Pieris rapae</i> (Pr)     | <i>Hyposoter ebeninus</i> (He) | 125           | 23.38                          | 9.78  |
| <i>Pieris brassicae</i> (Pb) | Unparasitized (Up)             | 135           | 74.77                          | 30.11 |
| <i>Pieris brassicae</i> (Pb) | <i>Cotesia glomerata</i> (Cg)  | 123           | 49.42                          | 24.22 |
| <i>Pieris brassicae</i> (Pb) | <i>Hyposoter ebeninus</i> (He) | 137           | 30.44                          | 15.29 |

\*Herbivore species significantly differed in the amount of damage inflicted to the plants (ANOVA,  $F = 30.11$ ,  $P < 0.001$ ).

<sup>†</sup>Parasitoid species significantly affected the amount of leaf damage (ANOVA,  $F = 246.66$ ,  $P < 0.001$ ). The interaction between the factors "herbivore" and "parasitism" was not significant (ANOVA,  $F = 0.28$ ,  $P = 0.76$ ).

**Table S5. Pearson's correlations between relative leaf damage and relative number of eggs oviposited on treatment A for each of the two choice tests offered to diamondback moth to study oviposition preference**

| Treatment A* | Treatment B | Pearson's correlation | n  | P    |
|--------------|-------------|-----------------------|----|------|
| Up Pr        | He Pr       | -0.06                 | 28 | 0.76 |
| Up Pr        | Cg Pr       | -0.23                 | 43 | 0.14 |
| He Pr        | Cg Pr       | -0.08                 | 30 | 0.69 |
| Up Pb        | He Pb       | -0.09                 | 34 | 0.59 |
| Up Pb        | Cg Pb       | -0.22                 | 31 | 0.23 |
| He Pb        | Cg Pb       | -0.07                 | 31 | 0.71 |
| Up Pr        | Up Pb       | -0.16                 | 30 | 0.93 |
| He Pr        | He Pb       | 0.28                  | 31 | 0.13 |
| Cg Pr        | Cg Pb       | -0.13                 | 30 | 0.49 |

\*Unparasitized (Up), *Hyposoter ebeninus*-parasitized (He), and *Cotesia glomerata*-parasitized (Cg) caterpillars of *Pieris rapae* (Pr) and *Pieris brassicae* (Pb).

**Table S6. Cloning specific genes from different signal pathways in cabbage plants (*B. oleracea*) by using degenerate primers that were derived from sequences of other plant species**

| GenBank accession no. | Gene           | Function                                   | GenBank accessions of different plant species whose sequences were used for designing degenerate primers |                   |          |                |                   |          |          |
|-----------------------|----------------|--------------------------------------------|----------------------------------------------------------------------------------------------------------|-------------------|----------|----------------|-------------------|----------|----------|
|                       |                |                                            | <i>Arabidopsis</i>                                                                                       | <i>Brassica</i>   | Rice     | Tomato         | Potato            | Tobacco  | Soybean  |
| EU921648              | <i>BoACS</i>   | 1-Aminocyclopropane-1-carboxylate synthase | U73786                                                                                                   | X82273            |          |                |                   |          |          |
| EF423802              | <i>BoDEF</i>   | Plant defensin                             | AY063779                                                                                                 | U59459            |          |                |                   |          |          |
| EF123055              | <i>BoGAPDH</i> | Glyceraldehyde-3-phosphate dehydrogenase   | M64116                                                                                                   | X04301            |          | U93208         | U17005            |          |          |
| EF123056              | <i>BoLOX</i>   | Lipoxygenase                               | NM104376, L23968                                                                                         | AY16214, AY162143 |          | U37839, U37840 | X96405, X96406    | AY254349 | X13302   |
| EF423803              | <i>BoMYC</i>   | JA-responsive transcription factor         | NM_102998                                                                                                |                   | AY536428 | AF011557       | AJ63050, AJ630506 |          |          |
| DQ456999              | <i>BoMYR</i>   | Myrosinase                                 | AY113880                                                                                                 | X60214            |          |                |                   |          |          |
| EF423804              | <i>BoPAL</i>   | Phenylalanine ammonia-lyase                | AY303128                                                                                                 | AY795078          |          |                |                   |          |          |
| EF423805              | <i>BoPIN</i>   | Cysteine proteinase inhibitor              | AB04405                                                                                                  | DQ539645          |          | X94946         | U45450            |          |          |
| EF423806              | <i>BoPR1</i>   | Pathogenesis-related protein-1             | AY117187                                                                                                 | U70666            |          | X68738         |                   | X05959   | AF136636 |
| EU921650              | <i>BoVSP</i>   | Vegetative storage protein                 | AY092991, AY114606                                                                                       |                   |          |                |                   |          |          |

**Table S7. Specific primers used for quantitative PCR**

| Gene           | Forward (from 5' to 3')        | Reverse (from 5' to 3')      |
|----------------|--------------------------------|------------------------------|
| <i>BoLOX</i>   | ACTTCCCGTCCCGTTCTTGG           | GATTGTCGTGCCCGTGAATGC        |
| <i>BoMYC</i>   | GGCTGGACCTACGCTATATTCTGG       | GCTCACGCAACACCTTCTTACG       |
| <i>BoVSP</i>   | GACTACCTCACTTCCACAG            | CGGGTCTATCTTCTGTCC           |
| <i>BoDEF</i>   | GTTTGCTTCCATCATCACCTTCTC       | CACTTGACCTCTCGCAACTTAG       |
| <i>BoPAL</i>   | TCGCTATGGCTTCTTACTGCTCTG       | GAGGTCTTACGAGATGAGATGAGTCC   |
| <i>BoPR1</i>   | GTCAACGAGAAGGCTAACTATAACTACG   | TTACACCTTGCTTGGCCACATCC      |
| <i>BoACS</i>   | ACTACGGTTGGCTGAAAGAC           | GAGAAAACGTTTCAGCTTACC        |
| <i>BoMYR</i>   | GTTTCTTAGACCGCCAGATCATAAAG     | CAGTGCTTACCTTCCACCAAATTC     |
| <i>BoPIN</i>   | TTCAAGAACATAACAACAAAGAGAACAAGG | GAGTTAGGTAGTACATCATTCCAGCAAC |
| <i>BoGAPDH</i> | GCTACGCAGAAGACAGTTGATGG        | TGGGCACACGGAAGGACATAC        |
